# Supplementary material for: Effect of commercial fibrolytic enzymes application to normal- and slightly lower energy diets on lactational performance, digestibility and plasma nutrients in high-producing dairy cows
Source: Frontiers journal article supplement (doi:10.3389/fvets.2024.1302034), 2024-05-03
Supplement: Data_Sheet_1.zip [file Data_Sheet_1.zip]

## Sheet: Sheet2
groups	Mean term:15-42D milk yield
NC	41.0768
NC+ABV	41.9933
PC	42.1451
PC+ABV	43.1983
(grand) total	42.1034

## Sheet: Sheet1
行标签	组别		试验前产奶量	15-42D产奶量	DMI	饲料效率	乳脂率%	蛋白率%	体细胞	体细胞变换	尿素氮	乳脂产量	乳蛋白产量	FCM	ECM	FCM/DMI	ECM/DMO
cow	energy Mcal/kg	enzym g/t	initalmilk	milk42	DMI	feedeffec	fat	cp	cell	cellchange	ureanN	milkfat	milkcp	FCM	ECM	FCMDMI	ECMDMI
190910	2.68	0	44.7333	45.2429	27.676	1.63473	4.57	3.74	70.2	11.1591	17	2.0676	1.69208	49.1111	53.1874	1.7745	1.92179
185517	2.68	0	45.1333	38.5214	27.676	1.39187	4.48	3.63	50.35	10.8268	16.8	1.72576	1.39833	41.295	44.5416	1.49209	1.60939
194067	2.68	0	43.1333	44.625	27.676	1.61241	3.83	3.58	50.1	10.8218	21.3	1.70914	1.59757	43.4871	47.7117	1.57129	1.72394
196549	2.68	0	41.8833	38.9143	27.676	1.40607	3.33	3.945	44.85	10.7111	16.8	1.29585	1.53517	35.0034	40.1037	1.26476	1.44904
198343	2.68	0	44.7333	41.6286	27.676	1.50414	2.975	3.2	31.15	10.3466	18.75	1.23845	1.33211	35.2282	38.8172	1.27288	1.40256
194034	2.68	0	45.2667	46.1607	27.676	1.6679	3.44	3.24	29	10.2751	18.4	1.58793	1.49561	42.2832	45.9336	1.52779	1.65969
198441	2.68	0	46.25	40.4929	27.676	1.4631	4.395	3.63	26.95	10.2017	15.5	1.77966	1.46989	42.8921	46.3785	1.54979	1.67576
192157	2.68	0	46.1	42.2679	27.676	1.52724	3.535	3.37	23.75	10.0753	16.55	1.49417	1.42443	39.3197	42.9631	1.42071	1.55236
193350	2.68	0	41.15	38.6536	27.676	1.39665	3.98	3.8	16.25	9.69585	14.9	1.53841	1.46884	38.5376	42.6715	1.39246	1.54182	2
199297	2.68	0	46.8167	40.6321	27.676	1.46814	3.67	3.465	14.1	9.55393	15.25	1.4912	1.4079	38.6209	42.2777	1.39546	1.52759
199866	2.68	0	45.6167	42.0821	27.676	1.52053	3.97	3.35	12.4	9.42545	18.3	1.67066	1.40975	41.8928	45.0692	1.51369	1.62846
194323	2.68	0	42.7833	38.6964	27.676	1.39819	5.6	3.645	9.4	9.14846	16.35	2.167	1.41048	47.9836	50.3583	1.73376	1.81957
194300	2.68	0	44.95	39.2214	27.676	1.41716	4.905	3.475	9.25	9.13238	17.2	1.92381	1.36294	44.5457	47.0666	1.60954	1.70063
199579	2.68	0	41.4667	38.6214	27.676	1.39548	4.255	3.6	9	9.10498	18.65	1.64334	1.39037	40.0987	43.4581	1.44886	1.57025
196418	2.68	0	43.3667	37.2929	27.676	1.34748	5.055	3.465	7.25	8.88876	13.7	1.88515	1.2922	43.1945	45.4454	1.56072	1.64205
194312	2.68	0	41.4833	36.475	27.676	1.31793	4.61	3.495	6.85	8.832	19.25	1.6815	1.2748	39.8125	42.4384	1.43852	1.5334
196617	2.68	0	45.7	47.3357	27.676	1.71035	4.05	3.33	6.6	8.79482	17.3	1.9171	1.57628	47.6907	51.116	1.72318	1.84694
198345	2.68	0	46.0333	42.1214	27.676	1.52195	3.595	3.195	6.5	8.77956	16.45	1.51427	1.34578	39.5626	42.6204	1.42949	1.53998
198625	2.68	0	43.15	41.7929	27.676	1.51008	4.61	3.915	5.95	8.69115	15.1	1.92665	1.63619	45.6169	49.8615	1.64825	1.80161
199036	2.68	0	43	40.7679	27.676	1.47304	4.755	3.515	5.5	8.6125	18.1	1.93851	1.43299	45.3848	48.2508	1.63986	1.74342
199320	2.68	0	45.2167	39.9179	27.676	1.44233	4.24	3.635	4.65	8.44462	17.15	1.69252	1.45101	41.3549	44.9382	1.49425	1.62373
185749	2.68	0	43.1	42.7714	27.676	1.54543	4.07	3.67	4.55	8.42288	14.4	1.7408	1.56971	43.2205	47.321	1.56166	1.70982
199279	2.68	0	43.1333	37.5714	27.676	1.35755	4.915	3.66	3.35	8.11672	15.5	1.84664	1.37511	42.7281	45.6242	1.54387	1.64851
194257	2.68	0	45.2167	42.2857	27.676	1.52788	4.315	3.475	2.7	7.90101	14.55	1.82463	1.46943	44.2837	47.5354	1.60008	1.71757
199376	2.68	0	41.25	38.2357	27.676	1.38155	4.51	3.62	2.6	7.86327	18.05	1.72443	1.38413	41.1607	44.3318	1.48724	1.60181
191304	2.68	0	43	39.8571	27.676	1.44013	5.81	3.48	2.4	7.78322	18.3	2.3157	1.38703	50.6784	52.4822	1.83113	1.89631
198416	2.68	0	43.8	39.0357	27.676	1.41045	4.07	3.74	2.4	7.78322	14.7	1.58875	1.45994	39.4456	43.3803	1.42526	1.56743
192143	2.68	0	43.8833	43.9357	27.676	1.5875	3.545	3.145	2.05	7.6256	17.8	1.55752	1.38178	40.9371	44.019	1.47916	1.59051
190982	2.68	0	42.8	42.4786	27.676	1.53485	4.265	3.495	1.55	7.34601	14.85	1.81171	1.48463	44.1671	47.5389	1.59586	1.71769
194419	2.68	0	44.4167	44.6679	27.676	1.61396	4.38	3.495	0.95	6.85646	17.5	1.95645	1.56114	47.2139	50.6496	1.70595	1.83009
199228	2.68	1000	43.25	39.2036	27.6	1.42042	4.73	3.61	97.65	11.4891	16.15	1.85433	1.41525	43.4964	46.5355	1.57596	1.68607
198228	2.68	1000	42.55	41.2821	27.6	1.49573	4.07	3.475	40.7	10.614	16.4	1.68018	1.43455	41.7156	45.1066	1.51143	1.6343
192415	2.68	1000	46.5167	44.9107	27.6	1.6272	4.52	3.55	27.7	10.2292	15.9	2.02996	1.59433	48.4137	51.9074	1.75412	1.8807
198215	2.68	1000	43.9833	42.6107	27.6	1.54387	4.29	3.25	12	9.39266	16.5	1.828	1.38485	44.4643	47.0888	1.61102	1.70612
199336	2.68	1000	44.7333	42.3786	27.6	1.53546	4.855	3.675	11.1	9.3147	18.85	2.05748	1.55741	47.8136	51.1795	1.73238	1.85433
199292	2.68	1000	46.2667	42.2	27.6	1.52899	3.76	3.345	10.8	9.2873	15.95	1.58672	1.41159	40.6808	44.0409	1.47394	1.59569
181365	2.68	1000	45.1333	44.5571	27.6	1.61439	4.31	3.17	10.45	9.25436	16.95	1.92041	1.41246	46.6291	49.1035	1.68946	1.77911
196425	2.68	1000	42.5833	38.2143	27.6	1.38458	4.26	3.325	10.3	9.2399	17.4	1.62793	1.27062	39.7046	42.2847	1.43857	1.53206
191939	2.68	1000	43.9333	40.6857	27.6	1.47412	4.41	3.615	10.25	9.23503	15.35	1.79424	1.47079	43.1879	46.6349	1.56478	1.68967
194015	2.68	1000	43.55	44.7571	27.6	1.62164	3.95	3.38	9.95	9.20533	15.95	1.76791	1.51279	44.4215	47.9135	1.60947	1.736
198211	2.68	1000	46.0833	40.972	27.6	1.48449	5.24	3.755	8.8	9.08251	14.25	2.14693	1.5385	48.5928	51.7401	1.76061	1.87464
191657	2.68	1000	44.0833	41.7179	27.6	1.51152	5.445	3.865	7.8	8.96188	15	2.27154	1.6124	50.7602	54.1048	1.83914	1.96032
197458	2.68	1000	40.4	39.9071	27.6	1.44591	4.14	3.655	7.7	8.94898	14.9	1.65216	1.45861	40.7452	44.4692	1.47628	1.6112
196591	2.68	1000	46.9333	44.2821	27.6	1.60443	4.08	3.555	6.3	8.7483	16.7	1.80671	1.57423	44.8135	48.6909	1.62368	1.76416
197573	2.68	1000	40.8	47.7393	27.6	1.72968	3.24	3.17	3.95	8.28147	17.8	1.54675	1.51334	42.297	46.0413	1.5325	1.66816
192478	2.68	1000	42.5667	38.4643	27.6	1.39363	5.255	3.475	3.8	8.24276	16.65	2.0213	1.33663	45.7052	47.8893	1.65599	1.73512
198684	2.68	1000	46.95	45.8179	27.6	1.66007	2.74	3.54	3.4	8.13153	17.2	1.25541	1.62195	37.1583	42.4356	1.34631	1.53752
198684	2.68	1000	46.95	45.8179	27.6	1.66007	2.74	3.54	3.4	8.13153	17.2	1.25541	1.62195	37.1583	42.4356	1.34631	1.53752
192027	2.68	1000	43	44.4286	27.6	1.60973	4.89	3.26	3.1	8.03916	15.3	2.17256	1.44837	50.3598	52.5571	1.82463	1.90424
198804	2.68	1000	42.75	43.0893	27.6	1.56121	4.77	3.8	2.7	7.90101	15.3	2.05536	1.63739	48.0661	51.9459	1.74153	1.8821
191619	2.68	1000	44.3333	42.6286	27.6	1.54451	4.81	3.09	2.6	7.86327	17.4	2.05043	1.31722	47.8079	49.4791	1.73217	1.79272
185746	2.68	1000	46.4	41.0571	27.6	1.48758	4.77	3.73	2.6	7.86327	16	1.95843	1.53143	45.7992	49.2938	1.65939	1.78601
199421	2.68	1000	42.1667	38.6571	27.6	1.40062	3.465	3.31	2.4	7.78322	15.05	1.33947	1.27955	35.5549	38.7817	1.28822	1.40514
192235	2.68	1000	44.9	39.8593	27.6	1.44418	4.4	3.51	2.3	7.74066	18	1.75381	1.39906	42.2508	45.3417	1.53083	1.64281
199102	2.68	1000	39.5333	38.5357	27.6	1.39622	5.155	4.045	2.15	7.67322	17.4	1.98652	1.55877	45.212	49.029	1.63812	1.77641
191499	2.68	1000	44	42.1	27.6	1.52536	5.145	4.035	2.05	7.6256	15.6	2.16604	1.69874	49.3307	53.4801	1.78734	1.93768
199103	2.68	1000	43.3833	38.6321	27.6	1.39972	3.875	3.45	1.85	7.52294	16.95	1.497	1.33281	37.9078	41.1743	1.37347	1.49182
198283	2.68	1000	44.4667	42.4429	27.6	1.53778	3.5	3.51	1.7	7.43838	16.3	1.4855	1.48974	39.2596	43.3683	1.42245	1.57131
192272	2.68	1000	47.5167	44.9679	27.6	1.62927	3.685	3.705	1.6	7.37776	16.55	1.65707	1.66606	42.8431	47.6355	1.55229	1.72592
192424	2.68	1000	42.05	37.8821	27.6	1.37254	5.61	3.67	1	6.90776	17.2	2.12519	1.39027	47.0307	49.414	1.70401	1.79036
194043	2.55	0	40.5667	35.3107	27.954	1.26317	6.33	4.015	63.95	11.0659	17.4	2.23517	1.41773	47.6518	50.1869	1.70465	1.79534
191632	2.55	0	42.9667	40.3	27.954	1.44165	4.86	3.34	48.1	10.781	19.2	1.95858	1.34602	45.4987	47.7447	1.62763	1.70797
185712	2.55	0	45.85	42.3571	27.954	1.51524	2.73	3.33	32.9	10.4012	16.3	1.15635	1.41049	34.2881	38.5497	1.22659	1.37904
196528	2.55	0	43.4	42.8571	27.954	1.53313	5.18	3.9	26.2	10.1735	15.8	2.22	1.67143	50.4429	54.2275	1.8045	1.93988
198307	2.55	0	42.5	43.5786	27.954	1.55894	3.75	3.28	19.1	9.85744	16.3	1.6342	1.42938	41.9444	45.2242	1.50048	1.61781
199367	2.55	0	42.8833	39.1185	27.954	1.39939	3.71	3.21	15.9	9.67407	17.8	1.4513	1.2557	37.4169	40.2017	1.33852	1.43814
196611	2.55	0	45.25	42.7519	27.954	1.52936	4.65	3.61	13.3	9.49552	13.8	1.98796	1.54334	46.9202	50.3076	1.67848	1.79966
199609	2.55	0	44.2	44	27.954	1.57401	4.21	3.77	12.3	9.41735	17.9	1.8524	1.6588	45.386	49.7822	1.6236	1.78086
198314	2.55	0	42.2833	40.475	27.954	1.44791	4.64	3.71	11.9	9.38429	16	1.87804	1.50162	44.3606	47.8612	1.58691	1.71214
195952	2.55	0	43.4	45.8393	27.954	1.63981	3.46	3.57	9.1	9.11603	17.1	1.58604	1.63646	42.1263	46.7966	1.50699	1.67406
190752	2.55	0	45.5333	41.6107	27.954	1.48854	3.75	3.32	8.8	9.08251	16	1.5604	1.38148	40.0503	43.2992	1.43272	1.54894
198523	2.55	0	42.0667	40.95	27.954	1.46491	4.41	3.72	6.8	8.82468	16.5	1.8059	1.52334	43.4684	47.2405	1.555	1.68994
196609	2.55	0	47.0333	44.4821	27.954	1.59126	4.42	3.78	6.6	8.79482	16.4	1.96611	1.68142	47.2845	51.5603	1.69151	1.84447
199440	2.55	0	41.7333	41.8893	27.954	1.49851	3.82	3.64	6.3	8.7483	17.5	1.60017	1.52477	40.7583	44.9098	1.45805	1.60656
199246	2.55	0	44.5833	40.85	27.954	1.46133	4.14	3.77	4.3	8.36637	17.2	1.69119	1.54005	41.7079	45.8505	1.49202	1.64021
199352	2.55	0	45.5667	44.6179	27.954	1.59612	3.6	3.31	3.6	8.18869	17.4	1.60624	1.47685	41.9408	45.5363	1.50035	1.62897
194408	2.55	0	44.6	41.7964	27.954	1.49519	4.76	3.61	3.4	8.13153	20.1	1.98951	1.50885	46.5612	49.7745	1.66564	1.78059
191750	2.55	0	45.55	43.4286	27.954	1.55357	4.57	3.8	3	8.00637	18.8	1.98469	1.65029	47.1417	51.238	1.6864	1.83294
191653	2.55	0	43.9667	42.5464	27.954	1.52202	4.39	3.48	3	8.00637	19.2	1.86779	1.48062	45.0354	48.2539	1.61105	1.72619
198773	2.55	0	41.6333	39.3857	27.954	1.40895	3.57	3.4	2.7	7.90101	18.6	1.40607	1.33911	36.8453	40.294	1.31807	1.44144
198773	2.55	0	41.6333	39.3857	27.954	1.40895	3.57	3.4	2.7	7.90101	18.6	1.40607	1.33911	36.8453	40.294	1.31807	1.44144
199571	2.55	0	44.4333	44.4893	27.954	1.59152	3.67	3.54	2.3	7.74066	18.4	1.63276	1.57492	42.2871	46.5259	1.51274	1.66437
196677	2.55	0	47.7	45.2786	27.954	1.61975	4.735	3.695	2.1	7.64969	16.75	2.14394	1.67304	50.2705	54.0467	1.79833	1.93342
194339	2.55	0	43.6667	42.4	27.954	1.51678	5.31	3.915	1.7	7.43838	20.75	2.25144	1.65996	50.7316	54.4027	1.81482	1.94615
196515	2.55	0	44.85	42.3286	27.954	1.51422	3.86	3.43	1.65	7.40853	17.2	1.63388	1.45187	41.4397	44.9728	1.48242	1.60881
196547	2.55	0	46.4	42.3464	27.954	1.51486	5.95	3.52	1.5	7.31322	24.4	2.51961	1.49059	54.7328	56.6417	1.95796	2.02625
198415	2.55	0	44.2167	42.6393	27.954	1.52534	4.595	3.52	1.45	7.27932	15.7	1.95928	1.5009	46.4448	49.6033	1.66147	1.77446
199149	2.55	0	41.6333	42.0679	27.954	1.5049	4.72	3.59	1.3	7.17012	18.4	1.9856	1.51024	46.6112	49.8221	1.66743	1.78229
194258	2.55	0	44.25	40.2893	27.954	1.44127	4.015	3.525	0.95	6.85646	19.25	1.61761	1.4202	40.3799	43.8786	1.44451	1.56967
199201	2.55	0	45.0667	44.9821	27.954	1.60915	3.97	3.45	0.9	6.80239	19.6	1.78579	1.55188	44.7797	48.4917	1.60191	1.7347
196610	2.55	1000	40.5	40.0857	28.097	1.42669	4.54	3.71	8.6	9.05952	12.3	1.81989	1.48718	43.3327	46.8854	1.54225	1.6687
196429	2.55	1000	43.2667	42.5036	28.097	1.51274	5.55	3.94	8.1	8.99962	15.6	2.35895	1.67464	52.3857	55.9222	1.86446	1.99033
196508	2.55	1000	45.9167	47.2321	28.097	1.68104	3.83	3.33	7.55	8.9293	15.35	1.80899	1.57283	46.0277	49.6679	1.63817	1.76773
198276	2.55	1000	44	40.3321	28.097	1.43546	4.74	3.765	7.05	8.86078	15.8	1.91174	1.51851	44.809	48.3671	1.5948	1.72143
199399	2.55	1000	41.2167	42.3179	28.097	1.50613	4.76	3.535	7	8.85367	12.6	2.01433	1.49594	47.1421	50.1721	1.67783	1.78567
198562	2.55	1000	44.7333	42.0607	28.097	1.49698	3.225	3.545	6.4	8.76405	15.7	1.35646	1.49105	37.1712	41.594	1.32296	1.48037
199340	2.55	1000	44.2167	41.5321	28.097	1.47817	4.78	3.16	6	8.69951	17.5	1.98524	1.31242	46.3914	48.2509	1.65112	1.7173
193349	2.55	1000	41.6	41.65	28.097	1.48236	4.66	3.375	5	8.51719	14.4	1.94089	1.40569	45.7733	48.3755	1.62912	1.72173
199208	2.55	1000	46.9667	48.8357	28.097	1.73811	3.41	3.365	4.85	8.48673	14.75	1.6653	1.64332	44.5138	48.8368	1.58429	1.73815
198705	2.55	1000	43.8333	44.6286	28.097	1.58837	4.39	3.215	4.75	8.4659	15.25	1.95919	1.43481	47.2393	49.7827	1.68129	1.77182
199404	2.55	1000	43.5667	41.9786	28.097	1.49406	3.235	3.65	4.45	8.40066	15	1.35801	1.53222	37.1615	41.877	1.32262	1.49044
192278	2.55	1000	46.7667	44.8714	28.097	1.59702	4.33	3.78	3.4	8.13153	18.7	1.94293	1.69614	47.0926	51.4922	1.67607	1.83266
198513	2.55	1000	44.1167	40.7036	28.097	1.44868	3.645	3.705	3.35	8.11672	17.05	1.48365	1.50807	38.5361	42.9089	1.37154	1.52717
196616	2.55	1000	43.2667	43.35	28.097	1.54287	5.15	3.755	3.3	8.10168	13.75	2.23252	1.62779	50.8279	54.2413	1.80901	1.9305
196445	2.55	1000	46.05	44.2571	28.097	1.57516	4.77	3.62	3.3	8.10168	18.5	2.11107	1.60211	49.3688	52.793	1.75709	1.87896
196291	2.55	1000	43.8167	39.8679	28.097	1.41894	3.875	3.42	3.1	8.03916	13.7	1.54488	1.36348	39.1203	42.4072	1.39233	1.50931
194418	2.55	1000	46.25	42.55	28.097	1.5144	4.74	3.19	2.7	7.90101	17.2	2.01687	1.35735	47.2731	49.3044	1.68249	1.75479
198181	2.55	1000	41.85	45.2929	28.097	1.61202	3.705	3.34	2.45	7.80384	14.95	1.6781	1.51278	43.2886	46.9324	1.54069	1.67037
197113	2.55	1000	41.9667	39.6071	28.097	1.40966	4.71	3.475	2.2	7.69621	14.55	1.8655	1.37635	43.8253	46.5363	1.55979	1.65627
194020	2.55	1000	44.6167	44.7393	28.097	1.59232	3.24	3.445	1.75	7.46737	14.8	1.44955	1.54127	39.639	44.0142	1.41079	1.56651
199226	2.55	1000	41.8667	39.8679	28.097	1.41894	5.81	3.575	1.7	7.43838	19.65	2.31632	1.42528	50.692	52.763	1.80418	1.87789
197258	2.55	1000	44.0667	42.7607	28.097	1.5219	5.005	3.195	1.7	7.43838	15.7	2.14017	1.3662	49.2069	51.0208	1.75132	1.81588
199328	2.55	1000	43.2333	42.5036	28.097	1.51274	4.25	3.37	1.65	7.40853	14.75	1.8064	1.43237	44.0975	47.1109	1.56947	1.67672
199326	2.55	1000	42.1	40.35	28.097	1.4361	5.685	3.72	1.5	7.31322	14.65	2.2939	1.50102	50.5485	53.1643	1.79907	1.89217
199145	2.55	1000	44.9333	45.3429	28.097	1.6138	4.47	3.44	1.5	7.31322	16	2.02683	1.55979	48.5395	51.7642	1.72757	1.84234
194392	2.55	1000	46.9167	46.7607	28.097	1.66426	3.39	3.48	1.4	7.24423	11.1	1.58519	1.62727	42.4821	47.02	1.51198	1.67349
198350	2.55	1000	42.3	43.0393	28.097	1.53181	5.525	3.525	1.2	7.09008	15.45	2.37792	1.51713	52.8845	55.2312	1.88221	1.96573
199081	2.55	1000	45.4	45.3929	28.097	1.61558	4.2	3.7	1.2	7.09008	14.4	1.9065	1.67954	46.7546	51.076	1.66404	1.81785
199100	2.55	1000	44.8667	47.7571	28.097	1.69972	4.22	3.485	1.05	6.95655	14.45	2.01535	1.66434	49.3331	53.1363	1.75581	1.89117
196554	2.55	1000	47.75	43.7786	28.097	1.55812	5.375	3.81	0.95	6.85646	18.8	2.3531	1.66796	52.8079	56.2138	1.87949	2.00071
